# Supplementary material
Source: MDPI journal article supplement (https://www.mdpi.com/2254-9625/14/5/90)
Supplement: s1 [file s1]

## SUPPLEMENTARY MATERIALS

### Text S1 English version of the MH questionnaire

The following is the original version of the MH questionnaire (translated from Italian). The different areas are highlighted.

#### (F1) Psychophysics Status:

- 1) How do you evaluate your relationship with your body?
- 2) How do you evaluate your level of mental and physical balance?
- 3) How do you evaluate your relationship with yourself?

#### (F2) Financial Status:

- 4) How fulfilled do you feel with your life at this moment?
- 5) How satisfied are you with your financial situation?
- 6) How financially sound do you feel?

#### (F3) Relational Private Sphere:

- 7) How do you evaluate the quality of your relationships with your dear ones?
- 8) At present, how satisfied are you with the atmosphere in your home?
- 9) In your opinion, how much do your family members appreciate you?

#### (F4) Socio-Relational Sphere:

- 10) In general, how happy do you think people are to interact with you?
- 11) How much do you think your behavior is appreciated in society?

#### (F5) Life Perspective:

- 12) How important is it to you to set long-term goals?
- 13) How much are you engaged in self-improvement?
- 14) How adaptable do you feel to major changes in your life?
